# Supplementary material for: Progression-Free and Overall Survival of First-Line Treatments for Advanced Renal Cell Carcinoma: Indirect Comparison of Six Combination Regimens
Source: MDPI journal article supplement (doi:10.3390/cancers15072029), 2023-03-29
Supplement: s1 [file s1]

## Supplementary Materials

**This Supplementary Materials includes the following material:**

- **Table S1.** Comparison of PFS and OS between combination treatments and sunitinib.
- **Figure S1.** Forest plots of HRs with 95%CI for PFS and OS of the six trials against pooled sunitinib controls
- **Figure S2:** Visual representation of indirect treatment comparisons for PFS.
- **Figure S3.** Visual representation of indirect treatment comparisons for OS.

**Table S1.** Results of statistical analysis of the comparison between combination treatments and sunitinib. Upper panel: PFS, Lower panel: OS. Each combination treatment has been compared with the pooled group of 6 sunitinib control arms.

| Combination treatment                                                                              | Median PFS in months<br>(95% CI) |                        | HR<br>(95% CI) §          | P       |
|----------------------------------------------------------------------------------------------------|----------------------------------|------------------------|---------------------------|---------|
|                                                                                                    | combination treatment            | sunitinib*             |                           |         |
| atezolizumab+ bevacizumab [11]                                                                     | 11.45 (9.87 to 13.5)             | 9.39 (8.12 to 10.10)   | 0.9822 (0.8637 to 1.117)  | 0.784   |
| avelumab+ axitinib [12]                                                                            | 13.85 (10.99 to 16.7)            | 8.17 (6.81 to 10.01)   | 0.8029 (0.7012 to 0.9193) | 0.00148 |
| nivolumab+ ipilimumab [13]                                                                         | 14.29 (12.02 to 18.8)            | 14.01 (11.80 to 16.34) | 0.6718 (0.596 to 0.7571)  | <0.001  |
| lenvatinib+ pembrolizumab [14]                                                                     | 24.52 (22.02 to 29.5)            | 9.83 (7.35 to 10.85)   | 0.4959 (0.4219 to 0.583)  | <0.001  |
| nivolumab+ cabozantinib [15]                                                                       | 17.12 (13.01 to 20.2)            | 8.67 (7.16 to 9.99)    | 0.6943 (0.5988 to 0.805)  | <0.001  |
| pembrolizumab + axitinib [16]                                                                      | 16.99 (14.21 to 21.1)            | 11.49 (10.10 to 12.75) | 0.701 (0.6142 to 0.8001)  | <0.001  |
| *The median of PFS in the pooled group of 6 sunitinib control arms is 9.92 months (9.53 to 10.09). |                                  |                        |                           |         |
| § Each combination treatment has been compared with the pooled group of 6 sunitinib control arms.  |                                  |                        |                           |         |
| Combination treatment                                                                              | Median OS in months<br>(95% CI)  |                        | HR<br>(95% CI) §          | P       |
|                                                                                                    | combination treatment            | sunitinib*             |                           |         |
| atezolizumab+ bevacizumab [11]                                                                     | 35.5 (28.9 to NA)                | 35.1 (27.7 to NA)      | 1.0818 (0.9148 to 1.2794) | 0.358   |
| avelumab+ axitinib [12]                                                                            | NA (30.0 to NA)                  | NA (27.9 to NA)        | 0.8562 (0.6984 to 1.0496) | 0.135   |
| nivolumab+ ipilimumab [13]                                                                         | 59.2 (48.0 to 70.3)              | 41.2 (35.6 to 49.6)    | 0.7338 (0.6348 to 0.8482) | <0.001  |
| lenvatinib+ pembrolizumab [14]                                                                     | NA (NA to NA)                    | NA (NA to NA)          | 0.5731 (0.4522 to 0.7263) | <0.001  |
| nivolumab+ cabozantinib [15]                                                                       | 37.9 (36.3 to NA)                | 34.3 (29.6 to NA)      | 0.8516 (0.6946 to 1.0440) | 0.122   |
| pembrolizumab + axitinib [16]                                                                      | NA (NA to NA)                    | 36.9 (33.4 to NA)      | 0.6601 (0.5369 to 0.8116) | <0.001  |

**Figure S1.** Forest plots of HRs with 95%CI for PFS and OS of the six trials against pooled sunitinib controls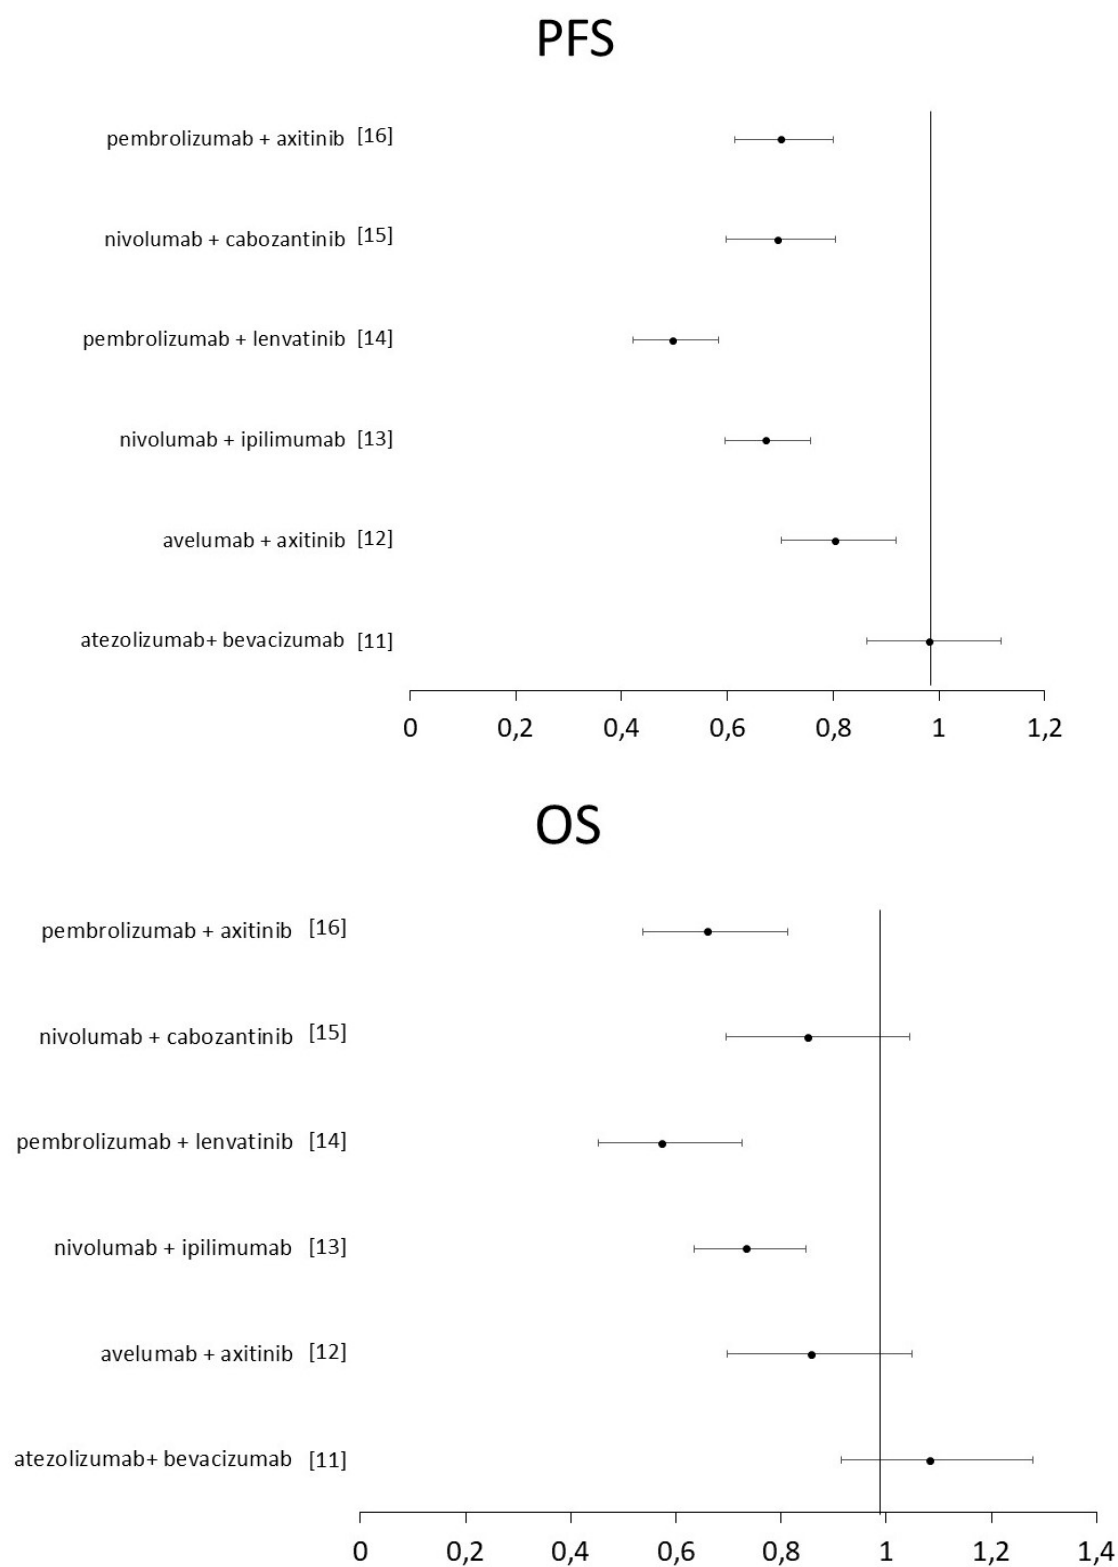

**Figure S2.** Visual representation of indirect treatment comparisons for PFS. All head-to-head comparisons are represented in form A vs. B, where treatment A is in the first column on the left and treatment B is in the second column, and so on. Green: A is superior to B; Red: A is inferior to B; Light Blue: no significant difference between A and B.

| ↓ vs. →                       | atezolizumab+<br>bevacizumab | avelumab+<br>axitinib | nivolumab+<br>ipilimumab | pembrolizumab<br>+ lenvatinib | nivolumab+<br>cabozantinib | pembrolizumab<br>+ axitinib |
|-------------------------------|------------------------------|-----------------------|--------------------------|-------------------------------|----------------------------|-----------------------------|
| atezolizumab+<br>bevacizumab  |                              |                       |                          |                               |                            |                             |
| avelumab+<br>axitinib         |                              |                       |                          |                               |                            |                             |
| nivolumab+<br>ipilimumab      |                              |                       |                          |                               |                            |                             |
| Pembrolizumab<br>+ lenvatinib |                              |                       |                          |                               |                            |                             |
| nivolumab+<br>cabozantinib    |                              |                       |                          |                               |                            |                             |
| pembrolizumab<br>+ axitinib   |                              |                       |                          |                               |                            |                             |

**Figure S3.** Visual representation of indirect treatment comparisons for OS. All head-to-head comparisons are represented in the form of A vs. B, where treatment A is in the first column on the left and treatment B is in the second column, and so on. Green: A is superior to B; Red: A is inferior to B; Light Blue: no significant difference between A and B.

| ↓ vs. →                       | atezolizumab+<br>bevacizumab | avelumab+<br>axitinib | nivolumab+<br>ipilimumab | pembrolizumab<br>+ lenvatinib | nivolumab+<br>cabozantinib | pembrolizumab<br>+ axitinib |
|-------------------------------|------------------------------|-----------------------|--------------------------|-------------------------------|----------------------------|-----------------------------|
| atezolizumab+<br>bevacizumab  |                              |                       |                          |                               |                            |                             |
| avelumab+<br>axitinib         |                              |                       |                          |                               |                            |                             |
| nivolumab+<br>ipilimumab      |                              |                       |                          |                               |                            |                             |
| pembrolizumab<br>+ lenvatinib |                              |                       |                          |                               |                            |                             |
| nivolumab+<br>cabozantinib    |                              |                       |                          |                               |                            |                             |
| pembrolizumab<br>+ axitinib   |                              |                       |                          |                               |                            |                             |
